# Supplementary material for: Catalpol attenuates hepatic glucose metabolism disorder and oxidative stress in triptolide-induced liver injury by regulating the SIRT1/HIF-1α pathway
Source: PubMed Central journal article supplement (PMC11302874; doi:10.7150/ijbs.97362), 2024-08-01
Supplement: ijbsv20p4077s1.pdf [file ijbsv20p4077s1.pdf]

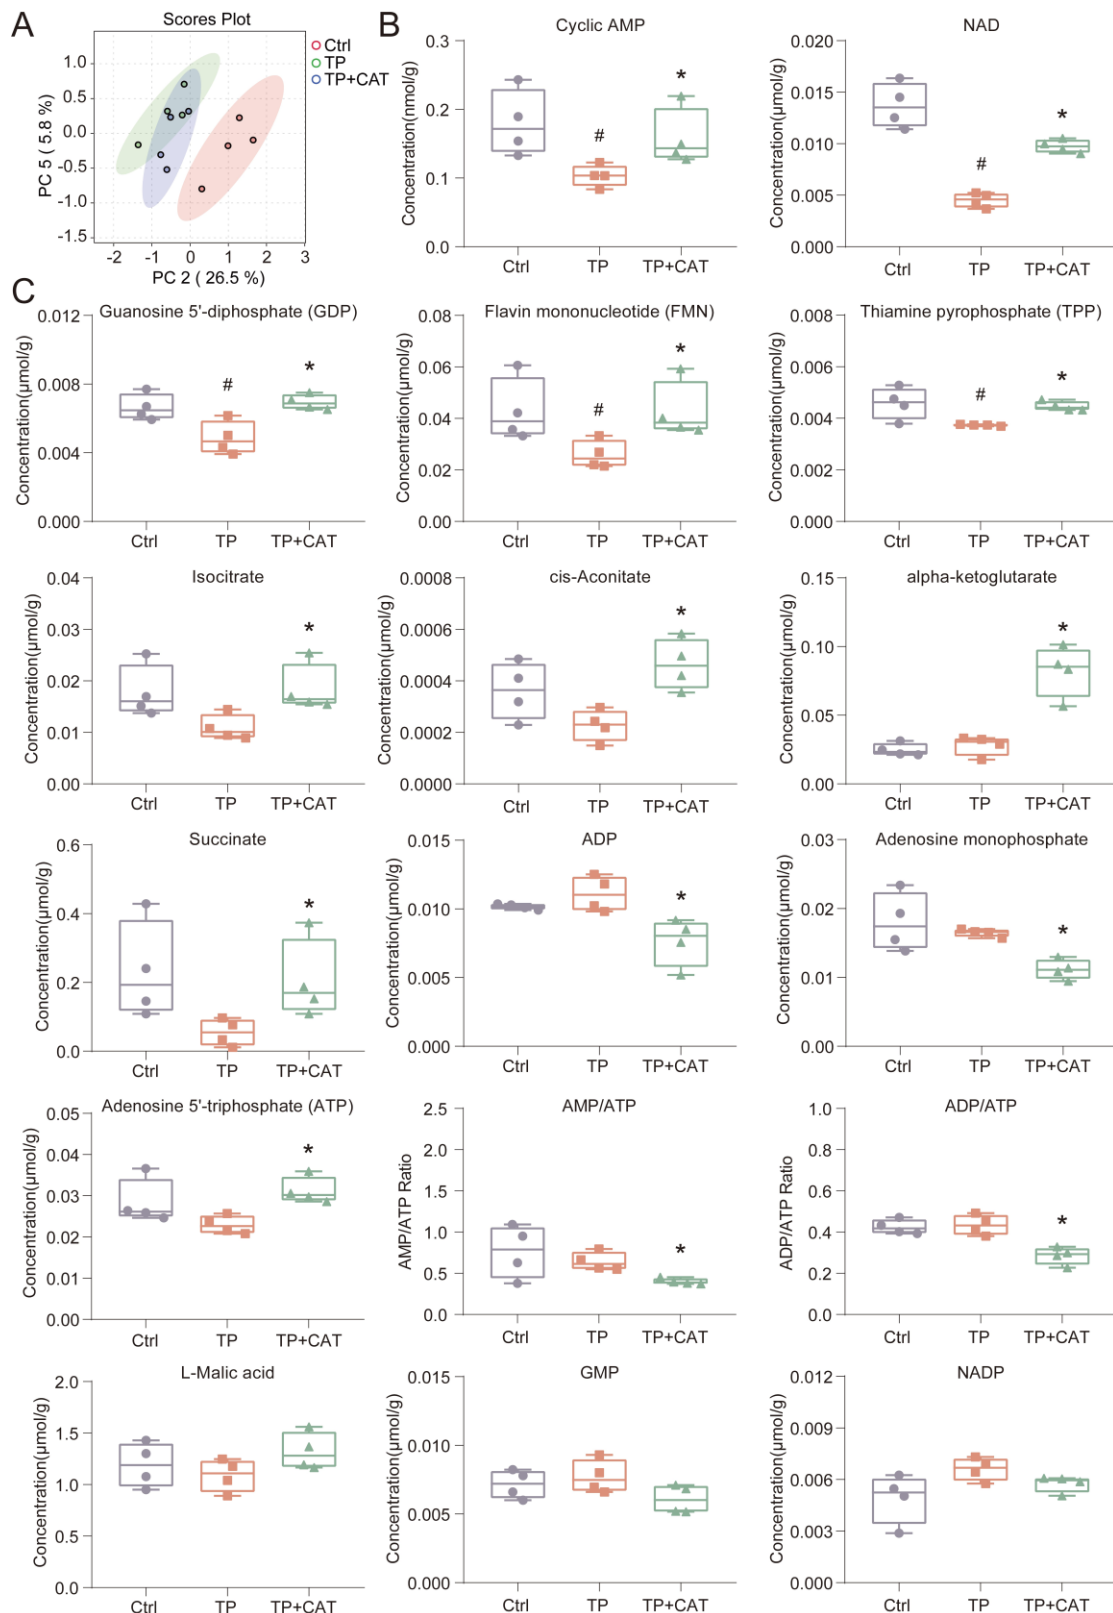

**Fig. S1. Catalpol (CAT) improved triptolide (TP) induced energy metabolism disorder in the liver.** (A) The PCA score plots for energy metabolites within the liver tissue of the three distinct groups (Ctrl, TP, and TP + CAT) were derived from UPLC-MS/MS assessments. (B-C) Box plots of some hepatic metabolites and their ratios in three groups (Ctrl, TP and TP + CAT groups). Data are expressed as mean  $\pm$  SD ( $n = 4$ ); # $P < 0.05$  versus Ctrl, \* $P < 0.05$  versus TP.

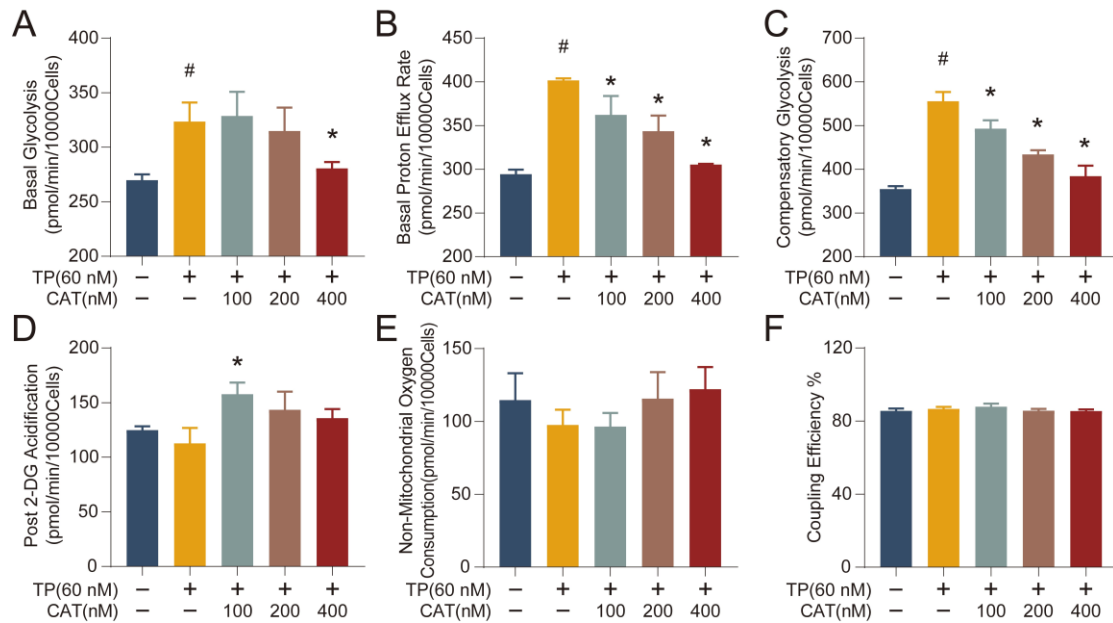

**Fig. S2. The beneficial role of catalpol (CAT) was related to regulating the balance between glycolysis and OXPHOS.** (A-D) Results from the quantitative analysis of the cellular glycolysis rates: basal glycolysis, basal proton efflux rate, compensatory glycolysis and post 2-DG acidification. (E-F) Results from the quantitative analysis of the cellular respiration parameters: non-mitochondrial oxygen consumption and coupling efficiency %. Data are expressed as mean  $\pm$  SD ( $n = 3$ ); <sup>#</sup> $P < 0.05$  versus Ctrl, <sup>\*</sup> $P < 0.05$  versus TP.

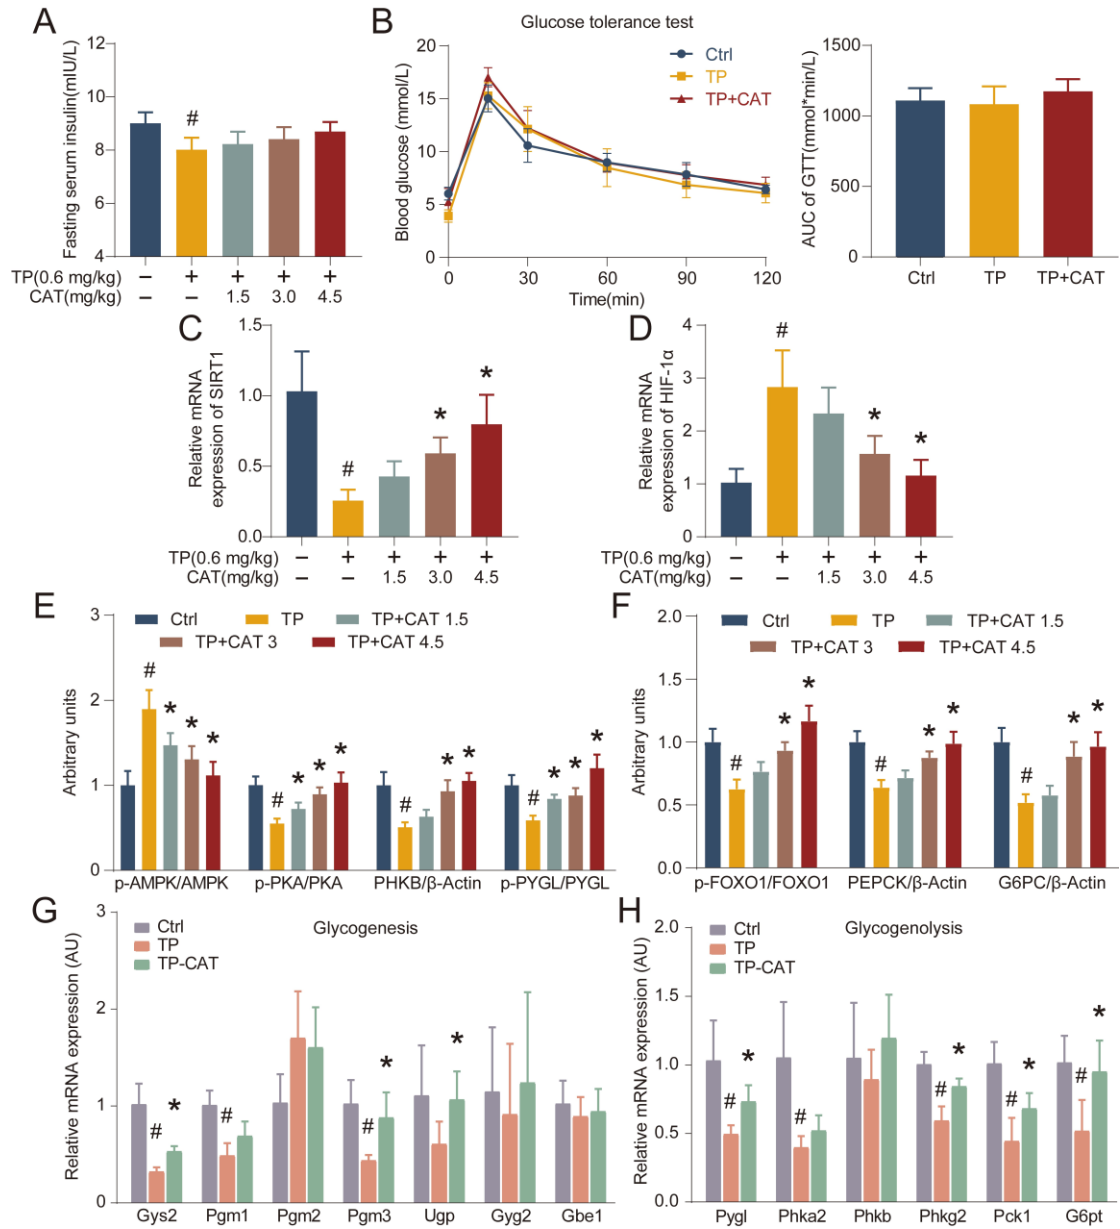

**Fig. S3. Catalpol (CAT) alleviated triptolide (TP) induced glycogen metabolism and gluconeogenesis disorders through the SIRT1/HIF-1α pathway.** (A) Fasting serum insulin levels. (B) Following a 16-hour fasting period, the mice received an intraperitoneal administration of D-glucose at a dosage of 1 g/kg body weight. Then, blood glucose levels were recorded at specific time intervals. The AUC values for blood glucose were subsequently computed. (C-D) The mRNA expression of SIRT1 and HIF-1α in mouse livers. (E-F) The expression of glycogenolysis and gluconeogenesis related proteins was quantified. (G) Relative expression of glycogenesis-related genes in mouse livers. (H) Relative expression of glycogenolysis-related genes in mouse livers. Data are expressed as mean ± SD ( $n = 6$ ); # $P < 0.05$  versus Ctrl, \* $P < 0.05$  versus TP.

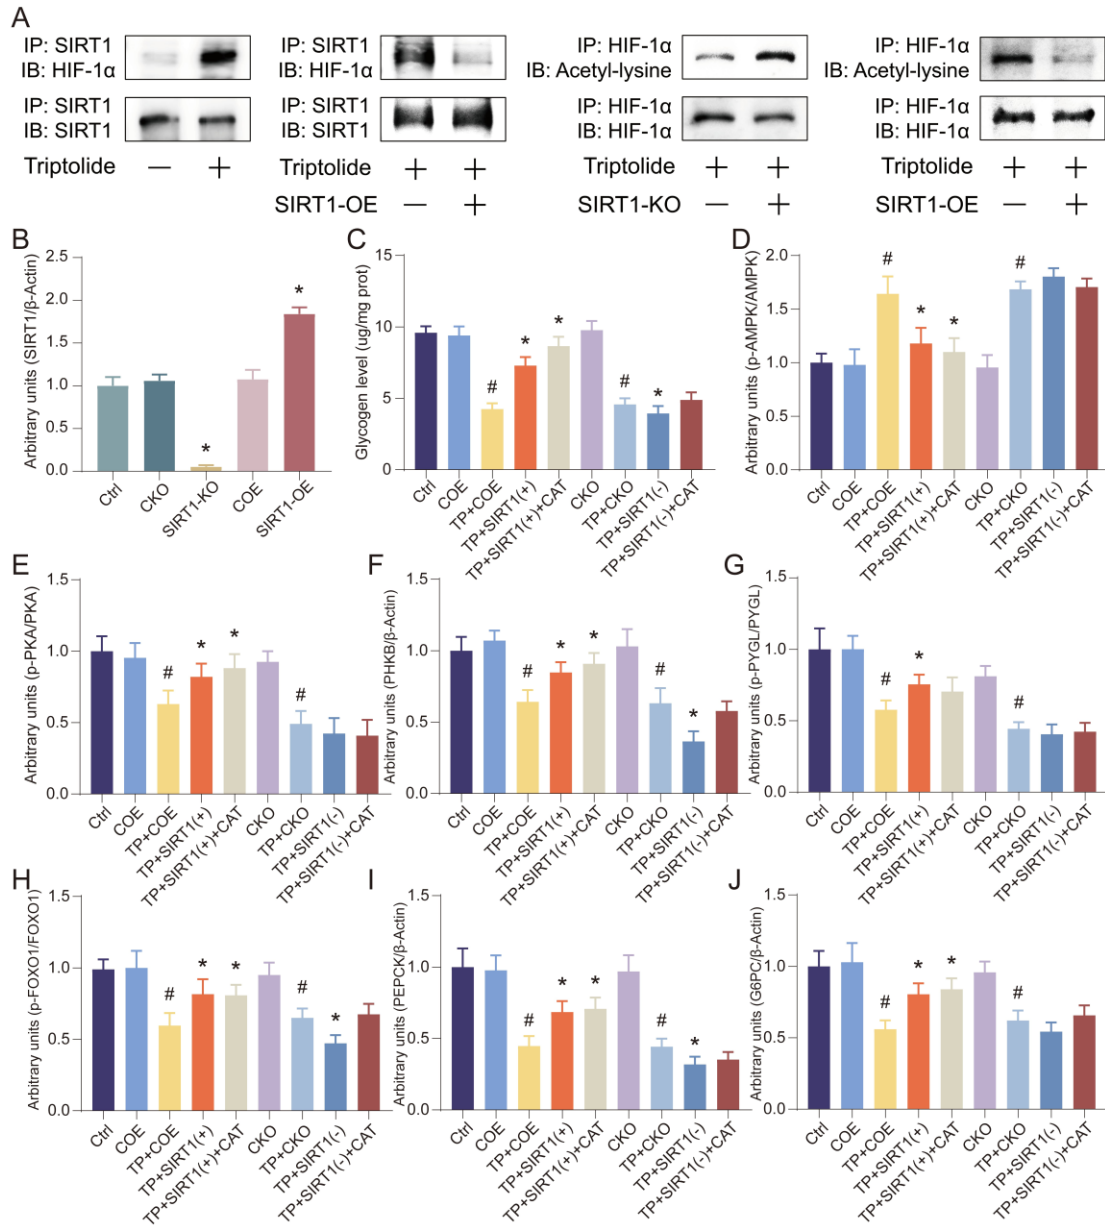

**Fig. S4. SIRT1/HIF-1α was the target of catalpol (CAT) and the beneficial effects of CAT were influenced by the overexpression or knockout of SIRT1 *in vitro*.** (A) Co-immunoprecipitation was performed using equal protein quantities with either SIRT1 antibody or HIF-1α antibody, followed by immunoblotting procedure using antibodies against SIRT1, HIF-1α or Acetyl-lysine, illustrating the impact of TP, *SIRT1* overexpression (OE) and *SIRT1* knockout (KO). (B) SIRT1 protein expression of transfected cells was quantified. (C) Glycogen levels in transfected cells. (D-J) The expression of glycogenolysis and gluconeogenesis related proteins in transfected cells was quantified. Data are expressed as mean  $\pm$  SD ( $n = 3$ ); # $P < 0.05$  versus Ctrl, COE or CKO, \* $P < 0.05$  versus TP, TP + COE or TP + CKO.

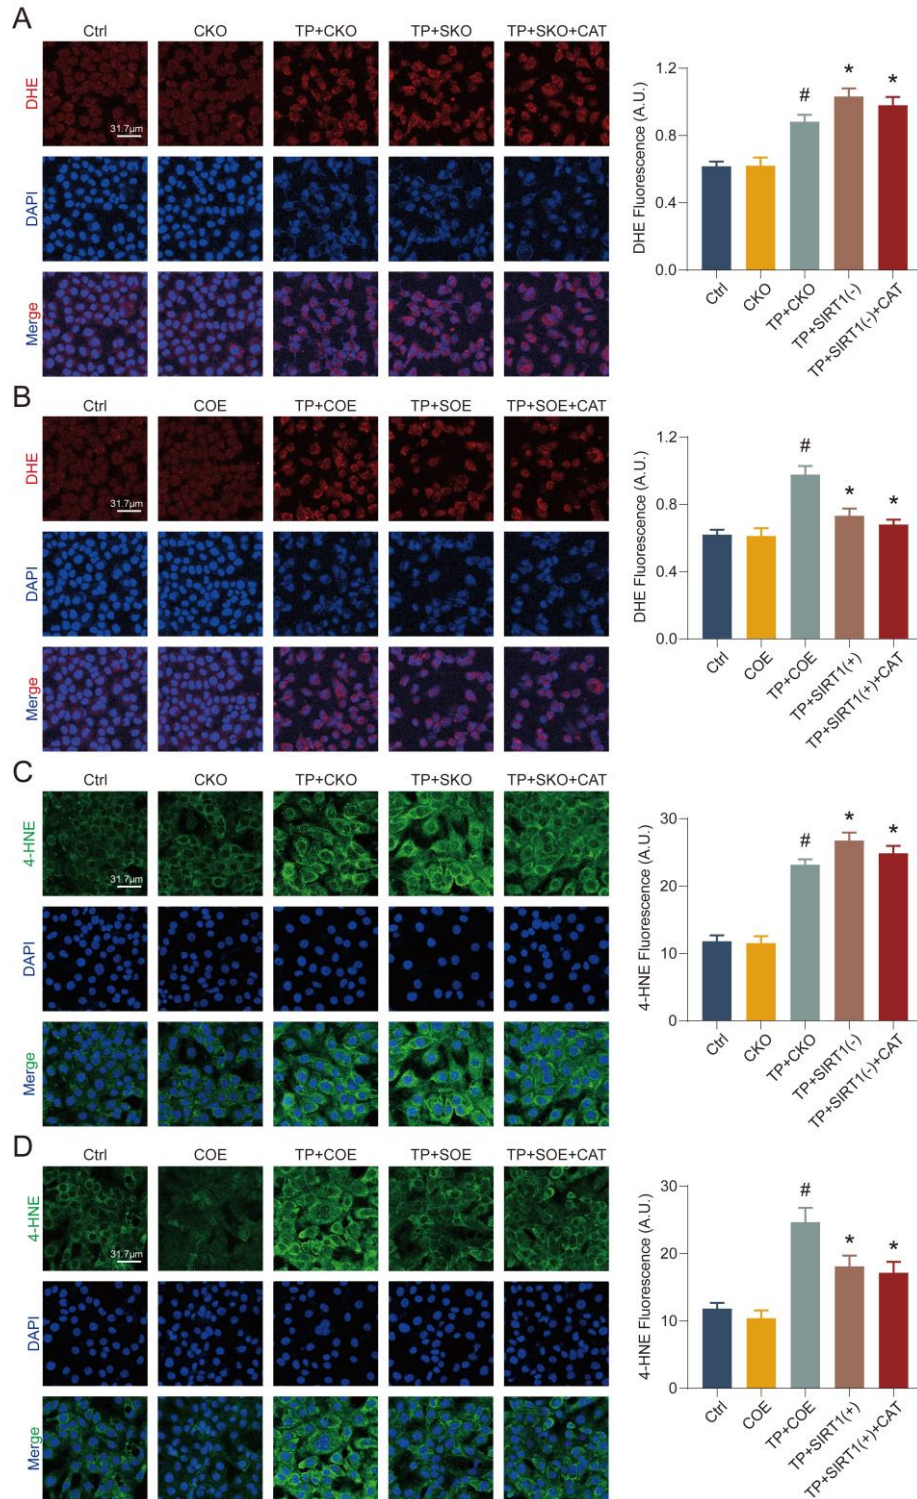

**Fig. S5. SIRT1/HIF-1 $\alpha$  was the target of catalpol (CAT) and the beneficial effects of catalpol were influenced by the overexpression or knockout of SIRT1 in vitro.** (A-B) Representative DHE fluorescence staining of transfected cells and relative quantification of DHE fluorescence images. Scale bar, 31.7  $\mu$ m. (C-D) Immunofluorescence staining of transfected cells using antibody against 4-HNE and relative quantification of 4-HNE fluorescence images. Scale bar, 31.7  $\mu$ m. Data are expressed as mean  $\pm$  SD ( $n = 3$ ); # $P < 0.05$  versus Ctrl, COE or CKO, \* $P < 0.05$  versus TP, TP + COE or TP + CKO.

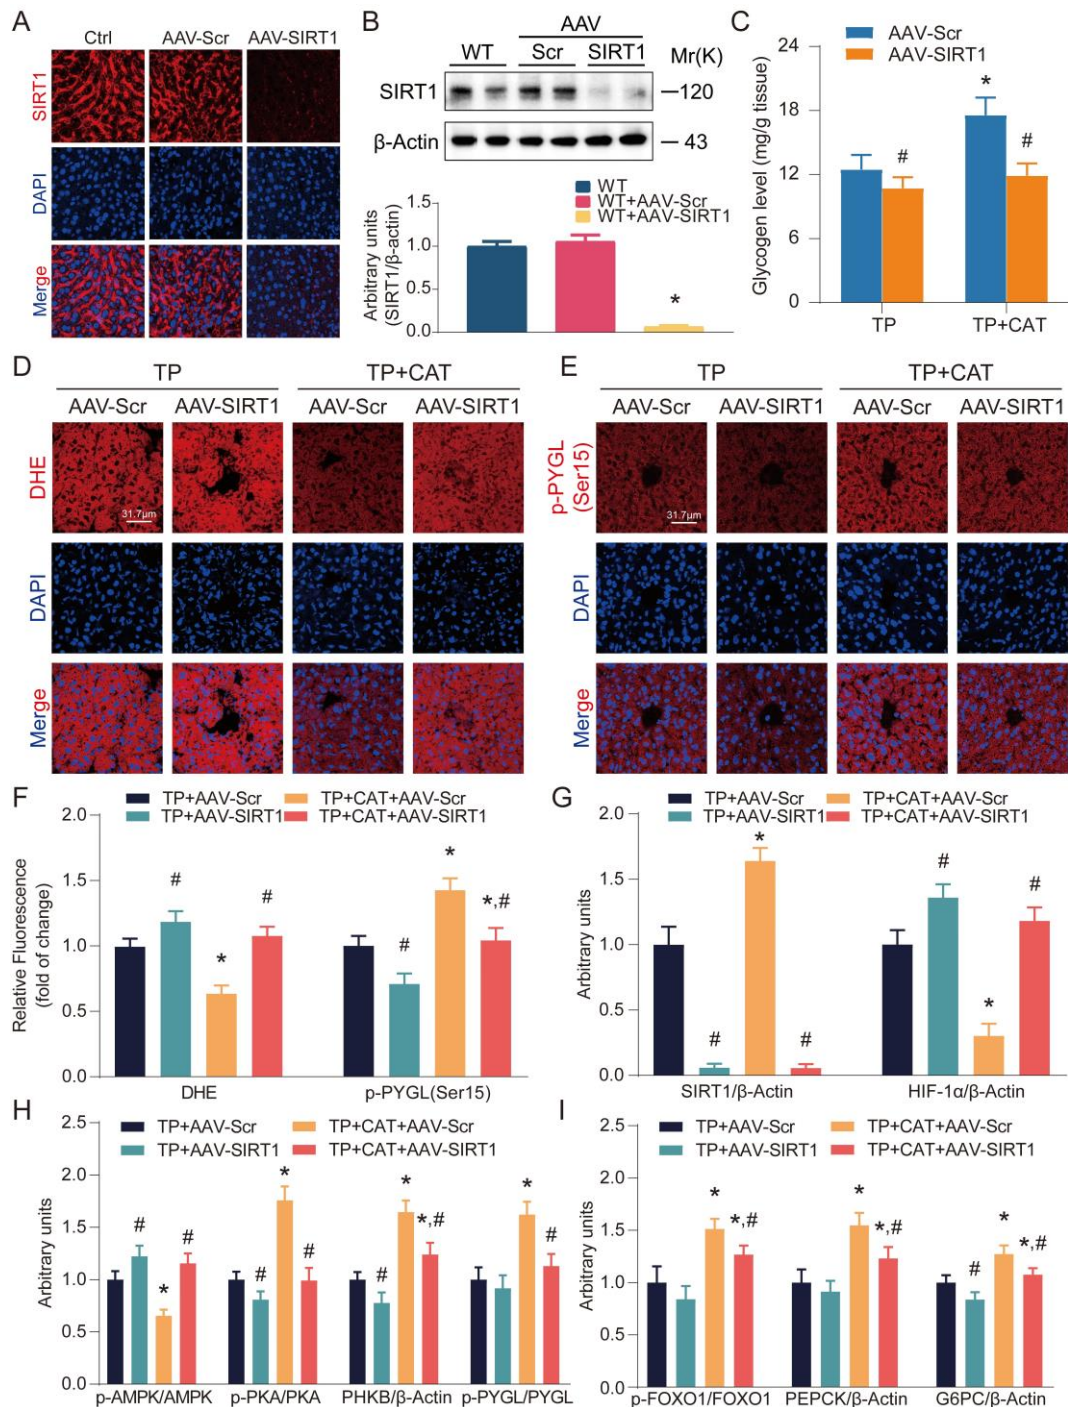

**Fig. S6. Liver-specific *SIRT1* knockout aggravated triptolide (TP) induced liver injury and weakened the beneficial effects of catalpol (CAT).** (A-B) Validation of liver-specific *SIRT1* knockout in mouse. (C) Glycogen levels. (D) Representative DHE fluorescence staining of liver sections for ROS production. Scale bar, 31.7  $\mu$ m. (E) Immunofluorescence staining of liver sections using antibodies against p-PYGL(S15). Scale bar, 31.7  $\mu$ m. (F) Relative quantification of DHE and p-PYGL(S15) fluorescence image. (G) Relative quantification of SIRT1 and HIF-1 $\alpha$  protein in mouse livers. (H-I) The expression of glycogenolysis and gluconeogenesis related proteins was quantified. Data are expressed as mean  $\pm$  SD ( $n = 3$ ); An “\*” indicates significant difference between TP and TP + CAT groups ( $P < 0.05$ ). A “#” indicates significant difference between AAV-Scr and AAV-SIRT1 in either TP or TP + CAT groups ( $P < 0.05$ ).

Table S1: Antibodies used in the study

| <b>Antibody</b>                                   | <b>Dilution ratio</b> | <b>Supplier</b>           | <b>Catalogue Number</b> | <b>RRID</b> |
|---------------------------------------------------|-----------------------|---------------------------|-------------------------|-------------|
| SirT1                                             | 1/1000                | Cell Signaling Technology | 8469                    | AB_10999470 |
| HIF-1 $\alpha$                                    | 1/1000                | Cell Signaling Technology | 36169                   | AB_2799095  |
| 4-Hydroxynonenal                                  | 1/500                 | R and D Systems           | MAB3249                 | AB_664165   |
| p-AMPK $\alpha$<br>(Thr172)                       | 1/1000                | Cell Signaling Technology | 2535                    | AB_331250   |
| AMPK $\alpha$ 1                                   | 1/1000                | Cell Signaling Technology | 2795                    | AB_560856   |
| p-PKA(T197)                                       | 1/1000                | ABclonal                  | AP0557                  | AB_2771456  |
| PKA                                               | 1/5000                | ABclonal                  | A18603                  | AB_2862360  |
| PHKB                                              | 1/1000                | Proteintech               | 13400-1-<br>AP          | AB_2237183  |
| p-PYGL (Ser15)                                    | 1/1000                | Affinity Biosciences      | AF3863                  | AB_2847177  |
| PYGL                                              | 1/1000                | Affinity Biosciences      | DF12134                 | AB_2844939  |
| p-FoxO1 (S256)                                    | 1/1000                | ABclonal                  | AP0172                  | AB_2771120  |
| FOXO1                                             | 1/1000                | ABclonal                  | A13862                  | AB_2760713  |
| PEPCK/PCK2                                        | 1/1000                | ABclonal                  | A4466                   | AB_2863279  |
| G6PC                                              | 1/1000                | Proteintech               | 66860-1-Ig              | AB_2882199  |
| Acetyllysine                                      | 1/300                 | PTM BIO                   | PTM-101                 | AB_2940830  |
| beta Actin                                        | 1/1000                | Affinity Biosciences      | AF7018                  | AB_2839420  |
| Tubulin beta                                      | 1/1000                | Affinity Biosciences      | AF7011                  | AB_2827688  |
| Goat anti-mouse<br>IgG                            | 1/10000               | Proteintech               | SA00001-1               | AB_2722565  |
| Goat anti-rabbit<br>IgG                           | 1/10000               | Proteintech               | SA00001-2               | AB_2722564  |
| CoraLite594<br>conjugated Goat<br>Anti-Mouse IgG  | 1/500                 | Proteintech               | SA00013-3               | AB_2797133  |
| CoraLite488<br>conjugated Goat<br>Anti-Rabbit IgG | 1/500                 | Proteintech               | SA00013-2               | AB_2797132  |

Table S2: Sequences of primer pairs used for amplification of mRNA by real-time PCR

| Gene Description | Primers for qPCR(5' > 3')                                  |
|------------------|------------------------------------------------------------|
| Gck              | F CCGAGATGCTATCAAGAGGAGAGG<br>R CTCACATTGGCGGTCTTCATAGTAG  |
| Pfkl             | F GCATCAAGCAGTCAGCCTCAG<br>R CAGTAGCCAGGTAGCCACAGTAG       |
| Pgk1             | F GCCAAGTCCGTTGTCCTTATGAG<br>R GCCCAGCAGAGATTTGAGTTCAG     |
| Pklr             | F TGTGGTGGCAGTCCGAGATG<br>R ACTTCTTCACGCCTTCATGGTTC        |
| Ldha             | F CTGTCACGGCTGGGTCCTG<br>R TCCTTCCACTGCTCCTTGTCTG          |
| Cs               | F ACTCATCCTGCCTCGTCCTTG<br>R GCTCCTTAGGTATCAGATTGCTCAG     |
| Idh3a            | F ACGGAAGGAGAATACAGTGGAATTG<br>R TTGCTTGCTTCTTCGGTGATGAG   |
| Ogdh             | F TGGCTCACTGCTGAAGGAAGG<br>R TGGTGGCGATGGCTGAAGG           |
| Sdhb             | F TCTACCGCTGCCACACCATC<br>R GCCAATGCTCGCTTCTCCTTG          |
| Fh               | F GTTACCGTTGGAGGCAGCAATG<br>R CTGTGAAGGACACTGAAGCATCTC     |
| Mdh2             | F AGGTTCTGCCACTCTGTCCATG<br>R ACACTCAACGACTCCTTCCTTCC      |
| Sirt1            | F TGATTGGCACCGATCCTCG<br>R CCACAGCGTCATATCATCCAG           |
| Hif-1 $\alpha$   | F TCTCGGCGAAGCAAAGAGTC<br>R AGCCATCTAGGGCTTTCAGATAA        |
| Gys2             | F TCAGTACCACCTTCTCCGTCAG<br>R CTCATCCTCATCTTCTTCGTCTTCC    |
| Pgm1             | F GGATTGGTCGCCTGGTTATTGG<br>R TCCTGGATTATGGCTGGCTGTC       |
| Pgm2             | F AAGACAGTGGTGGAGTGGAGAGTG<br>R TGGAGGAAACAGTGCTGGACAG     |
| Pgm3             | F CAGACCGCCTTCGTAGTCATTG<br>R AACAGTCACGCCATCTATCACAG      |
| Ugp              | F TGAACAACAAGACGCTGGAGAAC<br>R CACGGGCAAGAAACGGGAAC        |
| Gyg2             | F AGCACCAGGCGGCATTCC<br>R GCAAAGTGTGTGACCAGGAGAC           |
| Gbe1             | F GAACATAAGATGGTGGTTGGAGGAG<br>R TCCGTGGTGATGATAGAGCATAGAG |
| Pygl             | F GCTTGCTGCCTGCTTCCTG<br>R TCTGCCTCTTCTACCTGCCATC          |



---

|                |                                                          |
|----------------|----------------------------------------------------------|
| Phka2          | F AGAAGACCATATCTACGCCTCTACC<br>R CAATGCTGATGTCCTGTCCACTG |
| Phkb           | F CACAACCGCAACAGGCAGAC<br>R CCAAGGCAAACGCAGGGTAAC        |
| Phkg2          | F TCTGTGGTCCGCCGTTGTG<br>R TGTGTGTCTCTCGCCGTGTG          |
| Pck1           | F ACTGTTGGCTGGCTCTCACTG<br>R GGGATGGGCACTGTGTCTCTC       |
| G6pt           | F AGGTCGTGGCTGGAGTCTTG<br>R CGGAGGCTGGCATTGTAGATG        |
| Cybb           | F AGTGCGTGTTGCTCGACAA<br>R GCGGTGTGCAGTGCTATCAT          |
| $\beta$ -Actin | F GATGGTGGGAATGGGTCAGAAGG<br>R TTGTAGAAGGTGTGGTGCCAGATC  |

---
